# Supplementary material for: Pharmaceutical Development of Film-Coated Mini-Tablets with Losartan Potassium for Epidermolysis Bullosa
Source: MDPI journal article supplement (doi:10.3390/pharmaceutics14030570), 2022-03-05
Supplement: s1 [file s1]

## Supplementary Material

# Pharmaceutical Development of Film-coated Mini-tablets with Losartan Potassium for Epidermolysis Bullosa

Valentină Elezaj, Ard Lura, Luis Canha and Jörg Breitzkreutz

**Table S1.** Composition of mobile phase for purity analysis via HPLC

| Mobile phase     |                                                                                                                      |                   |                   |
|------------------|----------------------------------------------------------------------------------------------------------------------|-------------------|-------------------|
| buffer           | 1.25 mg/mL potassium dihydrogen phosphate and 1.5 mg/mL di-sodium hydrogen phosphate in water (pH approximately 7.0) |                   |                   |
| solution A       | acetonitrile and buffer (15:85)                                                                                      |                   |                   |
| solution B       | acetonitrile                                                                                                         |                   |                   |
|                  | time<br>[min]                                                                                                        | solution A<br>[%] | solution B<br>[%] |
| gradient elution | 0                                                                                                                    | 80                | 20                |
|                  | 10                                                                                                                   | 40                | 60                |
|                  | 11                                                                                                                   | 80                | 20                |
|                  | 20                                                                                                                   | 80                | 20                |

**Table S2.** Flow properties of F 8 and its single components, mean  $\pm$  sd, n=3, LP = losartan potassium, SMCC = silicified microcrystalline cellulose

| Material/powder | Hausner ratio   | Flowability (Ph.Eur. 10)* |
|-----------------|-----------------|---------------------------|
| F 8             | 1.35 $\pm$ 0.01 | poor                      |
| LP              | 1.50 $\pm$ 0.01 | very poor                 |
| SMCC 50         | 1.27 $\pm$ 0.02 | passable                  |

\*Rating by mean of Hausner ratio

**Table S3.** Particle size characterization and Hausner ratio of granules (F 10A, 10B, 10C), mean  $\pm$  sd, n=3

|                        | D <sub>10</sub> [ $\mu$ m] | D <sub>50</sub> [ $\mu$ m] | D <sub>90</sub> [ $\mu$ m] | Hausner ratio   | Flowability (Ph. Eur. 10)* |
|------------------------|----------------------------|----------------------------|----------------------------|-----------------|----------------------------|
| <b>F 10A (2 kN/cm)</b> | 59 $\pm$ 1                 | 634 $\pm$ 12               | 1135 $\pm$ 4               | 1.41 $\pm$ 0.01 | poor                       |
| <b>F 10B (4 kN/cm)</b> | 75 $\pm$ 1                 | 799 $\pm$ 8                | 1183 $\pm$ 4               | 1.35 $\pm$ 0.02 | poor                       |
| <b>F 10C (6 kN/cm)</b> | 101 $\pm$ 13               | 832 $\pm$ 12               | 1204 $\pm$ 4               | 1.33 $\pm$ 0.02 | passable                   |

\*Rating by mean of Hausner ratio

**Table S4.** Purity of the coated mini-tablets (F 10C) stored at 40 °C / 75 % r.h. and 25 °C / 60 % r.h. in different packaging conditions (openly, in polyethylene bags (PE) and in sealed aluminium foil (Alu)). For better overview only results at initial timepoint and after 6 months storage are shown (3<sup>rd</sup> month timepoint not shown), MT = mini-tablets, ND = not detected, < 0.1 % = impurities detected but not included in calculations

| Coated MT of F 10 C       | 6 months 25 °C / 60 % r.h. |         |        |         | 6 months 40 °C / 75 % r.h. |         |         |
|---------------------------|----------------------------|---------|--------|---------|----------------------------|---------|---------|
| Purity                    | Initial                    | Openly  | PE     | Alu     | Openly                     | PE      | Alu     |
| 1H Dimer                  | ND                         | ND      | ND     | ND      | < 0.1 %                    | < 0.1 % | < 0.1 % |
| 2H Dimer                  | ND                         | ND      | ND     | ND      | ND                         | ND      | < 0.1 % |
| Other single impurities   | ND                         | ND      | ND     | ND      | < 0.1 %                    | < 0.1 % | ND      |
| Sum of unknown impurities | ND                         | < 0.1 % | 0.10 % | < 0.1 % | 0.11 %                     | 0.13 %  | 0.13 %  |
| Sum of total impurities   | ND                         | < 0.1 % | 0.10 % | < 0.1 % | 0.11 %                     | 0.13 %  | 0.13 %  |

**Table S5.** Purity of the coated mini-tablets (F 11) stored at 40 °C / 75 % r.h. and 25 °C / 60 % r.h. in different packaging conditions (openly, in polyethylene bags (PE) and in sealed aluminium foil (Alu)). For better overview only results at initial timepoint and after 6 months storage are shown (3<sup>rd</sup> month timepoint not shown), MT = mini-tablets, ND = not detected, < 0.1 % = impurities detected but not included in calculations

[illegible]
